# Supplementary material for: DeepGeni: deep generalized interpretable autoencoder elucidates gut microbiota for better cancer immunotherapy
Source: PubMed Central journal article supplement (PMC10030841; doi:10.1038/s41598-023-31210-w), 2023-03-21
Supplement: 41598_2023_31210_MOESM1_ESM.pdf [file 41598_2023_31210_MOESM1_ESM.pdf]

## Supplementary Materials

### DeepGeni: Deep generalized interpretable autoencoder elucidates gut microbiota for better cancer immunotherapy

Min Oh<sup>1</sup> and Liqing Zhang<sup>1,\*</sup>

<sup>1</sup>Department of Computer Science, Virginia Tech, Blacksburg, VA, USA

\*Correspondence: lqzhang@cs.vt.edu

#### Contents

- **Figure S1.** t-SNE visualization of source, augmented, and test data
- **Figure S2.** Overlaps between four sets of 256 features derived from cross-study validation
- **Table S1.** Hyper-parameter grid for optimizing classifiers
- **Table S2.** AUC of the classifiers trained with different approaches
- **Table S3.** Accuracy metrics in cross-study validation setting
- **Table S4.** AUC per fold in cross-study validation setting

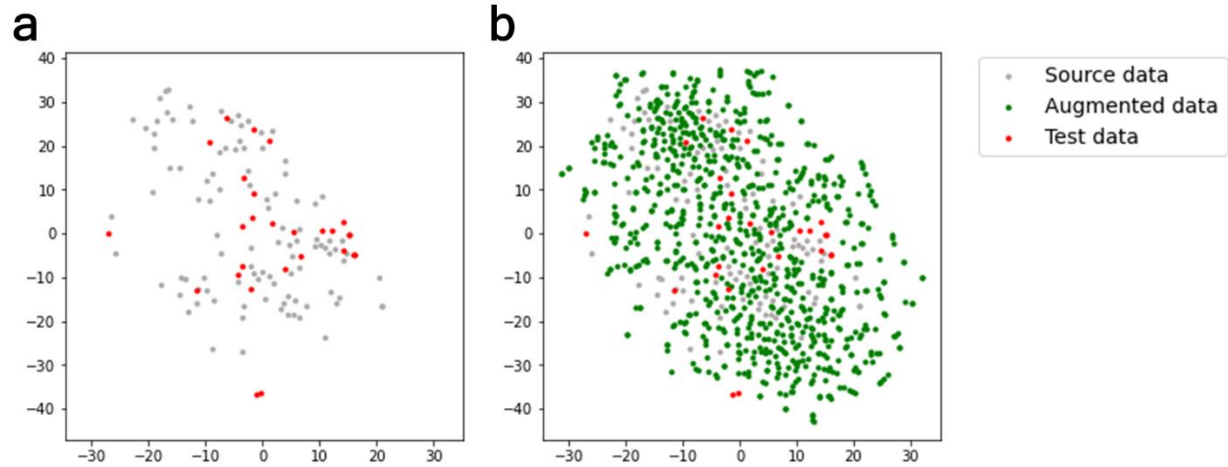

**Figure S1.** t-SNE visualization of source, augmented, and test data. **(a)** Test data is shown in red (Peters dataset) and the source data is shown in gray which is composed of Gopalakrishnan, Matson, and Frankel datasets. **(b)** Augmented data generated by DeepBioGen is plotted in green with the source and test data in (a).

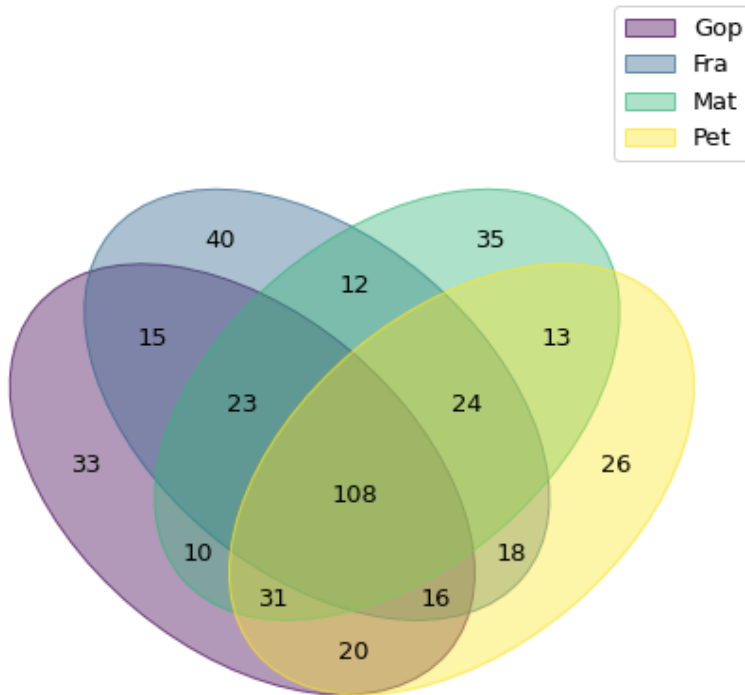

**Figure S2.** Overlaps between four sets of 256 features derived from cross-study validation. Each feature set is denoted and colored by leave-out study. Gop indicates 256 features derived by using Gopalakrishnan dataset as test data and fitting extremely randomized trees on the rest datasets as training data. Likewise, Mat stands for Matson, Fra for Frankel, and Pet for Peters dataset.

**Table S1.** Hyper-parameter grid for optimizing classifiers

| Classification algorithm | Hyper-parameter                          | Parameter grid                                                                                                                                                                                                                      |
|--------------------------|------------------------------------------|-------------------------------------------------------------------------------------------------------------------------------------------------------------------------------------------------------------------------------------|
| SVM                      | Kernel                                   | Linear and radial basis function (RBF)                                                                                                                                                                                              |
|                          | Regularization penalty $C$               | $2^{-4}$ , $2^{-3}$ , $2^{-2}$ , $2^{-1}$ , $2^0$ , $2^1$ , $2^2$ , and $2^4$                                                                                                                                                       |
|                          | Gamma                                    | 'Scale' (= $1/(n\_features * X.var())$ ) and 'Auto' (= $1/n\_features$ )                                                                                                                                                            |
| RF                       | # of estimators                          | $2^7$ , $2^8$ , $2^9$ , and $2^{10}$                                                                                                                                                                                                |
|                          | Maximum # of features for the best split | Square root and log2 of $n\_features$                                                                                                                                                                                               |
|                          | Split criterion                          | Gini impurity and information gain                                                                                                                                                                                                  |
| NN                       | Hidden layers (hidden units)             | 3 layers (128, 64, 32),<br>4 layers (128, 64, 32, 16), and<br>5 layers (128, 64, 32, 16, 8)                                                                                                                                         |
|                          | Learning rate                            | Constant (0.001),<br>invscaling ( $0.001 / \text{pow}(t, \text{power\_t})$ where $t$ is time step),<br>and<br>adaptive (keep learning rate as long as training loss is decreasing, otherwise divide the current learning rate by 5) |
|                          | Alpha (L2 penalty)                       | 0.0001, 0.001, 0.01, and 0.1                                                                                                                                                                                                        |

- SVM: support vector machine; RF: random forest; NN: feedforward neural network

**Table S2.** AUC of the classifiers trained with different approaches

| Approach  | Limeta et al. | No FS        |       |       | FS only |       |              | FS + AE      |       |       | DeepGeni (FS + DBG + AE) |       |              |
|-----------|---------------|--------------|-------|-------|---------|-------|--------------|--------------|-------|-------|--------------------------|-------|--------------|
| Algorithm | RF            | SVM          | RF    | NN    | SVM     | RF    | NN           | SVM          | RF    | NN    | SVM                      | RF    | NN           |
| AUC       | 0.624         | <b>0.667</b> | 0.543 | 0.531 | 0.673   | 0.574 | <b>0.679</b> | <b>0.698</b> | 0.673 | 0.605 | 0.744                    | 0.673 | <b>0.772</b> |

- FS: feature selection; AE: autoencoder; DBG: DeepBioGen

**Table S3.** Accuracy metrics in cross-study validation setting

| Approach      | Classifier | AUROC        | AUPRC        | REC          | PRE          | F1           |
|---------------|------------|--------------|--------------|--------------|--------------|--------------|
| FS + DBG + AE | SVM        | <b>0.626</b> | <b>0.678</b> | <b>0.587</b> | <b>0.677</b> | <b>0.595</b> |
|               | RF         | 0.579        | 0.612        | 0.544        | 0.642        | 0.561        |
|               | NN         | 0.609        | 0.652        | 0.523        | 0.599        | 0.548        |
| FS + AE       | SVM        | 0.602        | 0.643        | 0.514        | 0.590        | 0.522        |
|               | RF         | 0.570        | 0.611        | 0.450        | 0.566        | 0.482        |
|               | NN         | 0.598        | 0.636        | 0.524        | 0.564        | 0.532        |
| FS Only       | SVM        | 0.564        | 0.623        | 0.524        | 0.599        | 0.535        |
|               | RF         | 0.551        | 0.600        | 0.389        | 0.513        | 0.410        |
|               | NN         | 0.585        | 0.639        | 0.453        | 0.571        | 0.492        |
| No FS         | SVM        | 0.520        | 0.608        | 0.497        | 0.449        | 0.406        |
|               | RF         | 0.522        | 0.615        | 0.436        | 0.554        | 0.440        |
|               | NN         | 0.556        | 0.625        | 0.496        | 0.535        | 0.500        |

**Table S4.** AUC per fold in cross-study validation setting

| Approach  |                | No FS |       |       | FS only |       |       | FS + AE |       |              | DeepGeni<br>(FS + DBG + AE) |       |       |
|-----------|----------------|-------|-------|-------|---------|-------|-------|---------|-------|--------------|-----------------------------|-------|-------|
| Algorithm |                | SVM   | RF    | NN    | SVM     | RF    | NN    | SVM     | RF    | NN           | SVM                         | RF    | NN    |
| Test data | Gopalakrishnan | 0.37  | 0.617 | 0.597 | 0.558   | 0.682 | 0.571 | 0.734   | 0.649 | 0.669        | <b>0.779</b>                | 0.601 | 0.747 |
|           | Frankel        | 0.642 | 0.478 | 0.626 | 0.605   | 0.507 | 0.605 | 0.524   | 0.528 | 0.584        | <b>0.658</b>                | 0.586 | 0.624 |
|           | Matson         | 0.4   | 0.5   | 0.469 | 0.42    | 0.4   | 0.486 | 0.45    | 0.4   | <b>0.533</b> | 0.32                        | 0.5   | 0.292 |
|           | Peters         | 0.667 | 0.543 | 0.531 | 0.673   | 0.574 | 0.679 | 0.698   | 0.673 | 0.605        | <b>0.744</b>                | 0.673 | 0.772 |

- FS: feature selection; AE: autoencoder; DBG: DeepBioGen
